# Supplementary material
Source: publisher site journal article supplement (https://www.dovepress.com/article/256993)

**Figure S1 The impact of sodium selenite on normal B lymphocytes.** PBMCs of healthy volunteers were isolated by Ficoll and normal B cells were isolated by MACS. Flow cytometry was performed to detect the percentage of survival cells before (left) and after (right) adding 3.2μM sodium selenite. The p-value was 0.3865, indicating that sodium selenite had no toxicity on normal B lymphocytes.


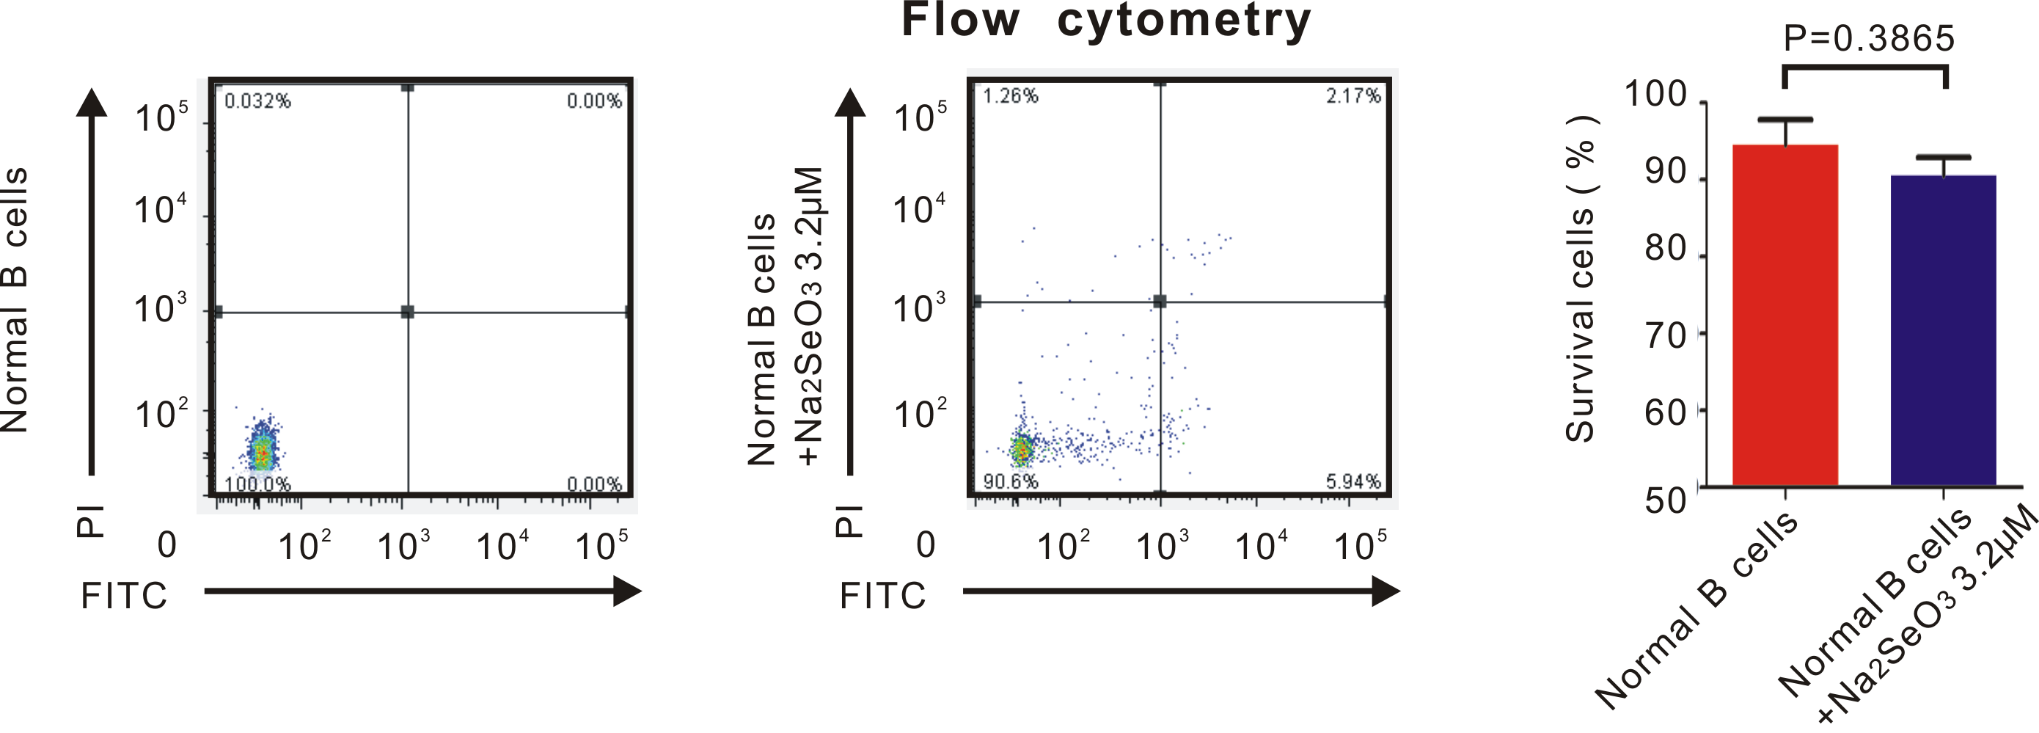

Supplement: Supplementary file 1 [file get_supplementary_file.php]
